# Supplementary material for: The effects of Au nanoparticle size (5–60 nm) and shape (sphere, rod, cube) over electronic states and photocatalytic activities of TiO2studied by far- and deep-ultraviolet spectroscopy
Source: Royal Society of Chemistry journal article supplement (doi:10.1039/c4ra12503g), 2015-01-01
Supplement: c4ra12503g1.pdf [file c4ra12503g1.pdf]

[Supporting Information]

**The effects of Au nanoparticles size (5-60 nm) and shape (sphere, rod, cube) over electronic states and photocatalytic activities of TiO<sub>2</sub> studied by far- and deep-ultraviolet spectroscopy**

Ichiro Tanabe,\* Takayuki Ryoki and Yukihiro Ozaki\*

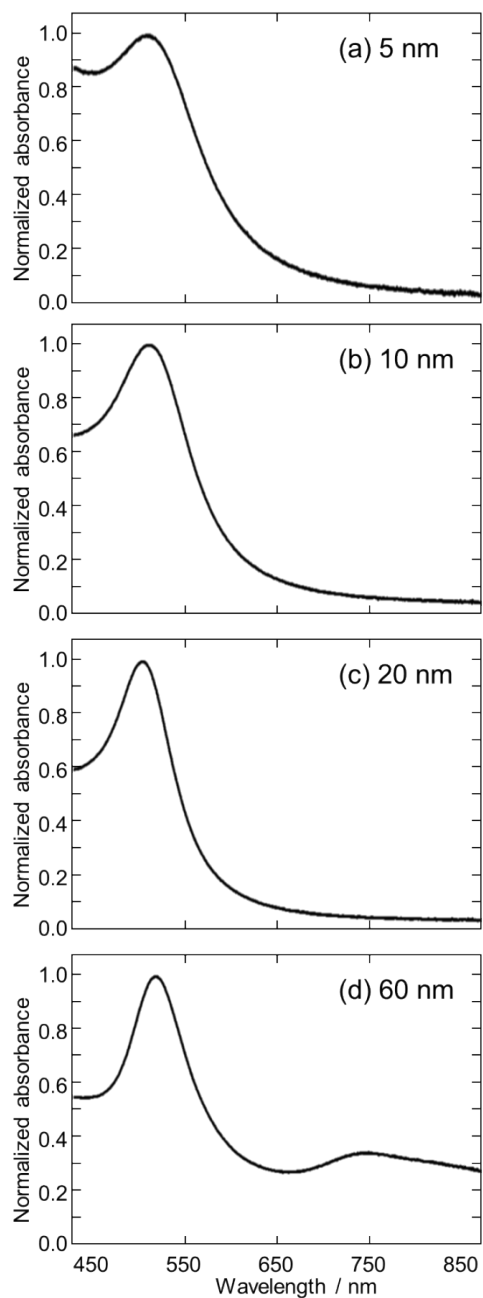

Figure S1. Normalized absorption spectra of (a) 5 nm-Au (b) 10 nm-Au, (c) 40-nm Au, and (d) 60 nm-Au colloids.

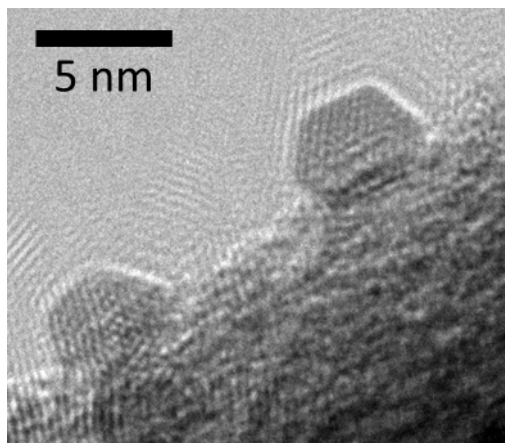

**Figure S2.** A typical HRTEM image of the Au nanosphere (5 nm) on TiO<sub>2</sub>. This image was measured on a Tecnai G2 transmission electron microscope operating at 200 kV.

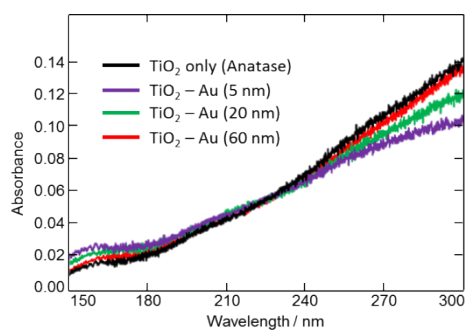

**Figure S3.** ATR spectra of anatase TiO<sub>2</sub> with or without Au nanospheres (5, 20, and 60 nm). The amounts of Au nanospheres are regulated to the almost same weight ( $\sim 1.3 \times 10^{-4}$  g on 1 g TiO<sub>2</sub>).

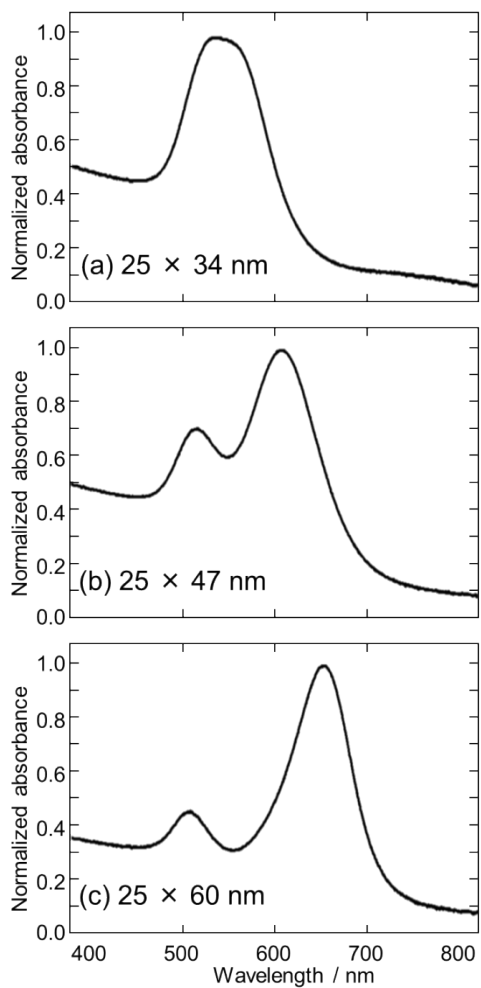

**Figure S4. Normalized absorption spectra of Au nanorods. Sizes of Au nanorods are 25 nm × (a) 34 nm, (b) 47 nm, and (c) 60 nm, respectively.**

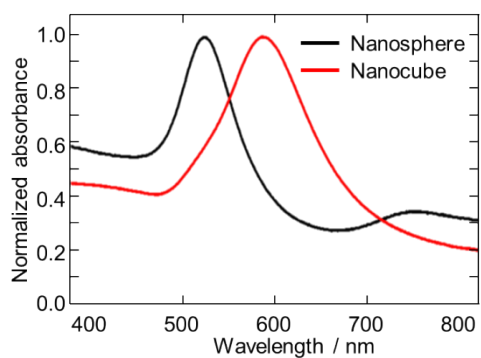

**Figure S5. Normalized absorption spectra of Au nanospheres (black) and Au nanocubes (red).**

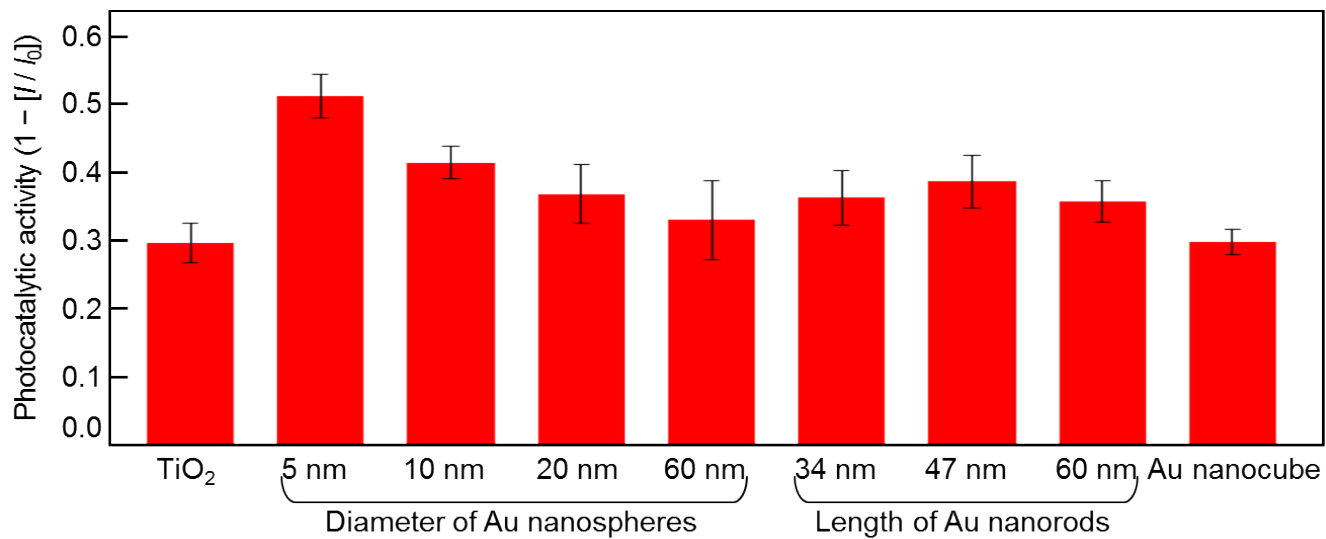

Figure S6. Photocatalytic activities ( $1 - [I/I_0]$ ) of (a) anatase TiO<sub>2</sub> with and without Au nanoparticles.
